# Supplementary material for: Heterozygosity at a conserved candidate sex determination locus is associated with female development in the clonal raider ant (Ooceraea biroi)
Source: eLife. 2025 Nov 5;14:RP106913. doi: 10.7554/eLife.106913 (PMC12588609; doi:10.7554/eLife.106913)
Supplement: Supplementary file 1. — 5.4 refers to the reference genome version (GCA_003672135.1). [file elife-106913-supp1.xlsx]

## Sheet: Sheet1
Primer Name	5.4 Scaffold	5.4 Position	Forward 5'-3'	Reverse 5'-3'	Genotyping Method
Obir Ploidy 12SV	Chr12	12801234	TAGATCGAGTGAGGTATCTT	AGCGTTAAGAGTAGATTAAG	Visualize differently sized alleles (i.e., different versions of a structural variant [SV]) using gel electrophoresis
Obir Ploidy 4RE	Chr4	5840887	CCACCCTCTCTCTCGTCTC	TGCCGATTCATATTTCGAGATAAAC	Separately digest products with the restriction enzymes (REs) EcoRI and BsmI and visualize genotypes via gel electrophoresis
Obir Ploidy 5RE	Chr5	1963279	GCGATAGAAGAGTGCTCGTATT	GCCAGTCAGTCTGTCATTCA	Separately digest products with the restriction enzymes (REs) EcoRI and AvaII and visualize genotypes via gel electrophoresis
Obir Ploidy 2SNP	Chr2	18082503	CACGTACAATGAGGGAACCTAA	TCGCGATCATGAAATCTAACCT	Sanger sequence and call SNPs
Obir Ploidy 12SNP	Chr12	8100152	GTCAGTGCGCTGTTCATTTC	AGATTATAGGGCGTTCCAATTCT	Sanger sequence and call SNPs
Obir Ploidy 14SNP	Chr14	6377499	CACGTGAACGCTACGATGAA	GGGTTGAGGATGTCTAAGGTAATG	Sanger sequence and call SNPs
Obir Ploidy 13SNPa	Chr13	6262370	CGTTACACTCCTGTGTCGAATC	GCACGTAGCATTCTCTCTTTCT	Sanger sequence and call SNPs
Obir Ploidy 13SNPb	Chr13	7173724	GCCATACATCCTGCACTCTTAC	CGACGAGCATGCGTCTAAA	Sanger sequence and call SNPs
