# Supplementary material for: Heterozygosity at a conserved candidate sex determination locus is associated with female development in the clonal raider ant (Ooceraea biroi)
Source: eLife. 2025 Nov 5;14:RP106913. doi: 10.7554/eLife.106913 (PMC12588609; doi:10.7554/eLife.106913)
Supplement: Supplementary file 3. — Question marks indicate male samples for which the clonal line is known, but the stock colony of origin was not recorded. [file elife-106913-supp3.xlsx]

## Sheet: Sheet1
Sample name	Library prep method	Clonal line	Stock colony	Sample type	Mean read depth	BioProject
LineA_DiploidFemale_1	Nextera Flex	A	C16	Diploid Female	30.1	PRJNA923657
LineA_DiploidFemale_2	Nextera Flex	A	C16	Diploid Female	27.4	PRJNA923657
LineB_DiploidFemale_1	Nextera Flex	B	STC6	Diploid Female	28.3	PRJNA923657
LineA_DiploidFemale_6	Nextera Flex	A	C18	Diploid Female	30	PRJNA923657
LineA_DiploidFemale_5	Nextera Flex	A	C1	Diploid Female	41.5	PRJNA923657
LineA_DiploidFemale_3	Nextera Flex	A	C16	Diploid Female	26.6	PRJNA947942
LineA_DiploidFemale_4	Nextera Flex	A	C16	Diploid Female	24.1	PRJNA947942
LineB_DiploidFemale_2	Nextera Flex	B	STC6	Diploid Female	27	PRJNA947942
LineB_DiploidFemale_3	Nextera Flex	B	STC6	Diploid Female	47.1	PRJNA947942
LineA_HaploidMale_1	Nextera Flex	A	C16	Haploid Male	26.1	PRJNA947942
LineA_HaploidMale_2	Nextera Flex	A	C16	Haploid Male	26.1	PRJNA947942
LineA_HaploidMale_3	Nextera Flex	A	C16	Haploid Male	27.6	PRJNA947942
LineA_HaploidMale_4	Nextera Flex	A	C16	Haploid Male	25.8	PRJNA947942
LineB_HaploidMale_1	Nextera Flex	B	STC6	Haploid Male	26.3	PRJNA947942
LineB_HaploidMale_2	Nextera Flex	B	STC6	Haploid Male	27.6	PRJNA947942
LineB_HaploidMale_3	Nextera Flex	B	STC6	Haploid Male	31.7	PRJNA947942
LineB_DiploidFemale_5	Nextera Flex	B	STC12	Diploid Female	42.4	PRJNA947942
LineB_DiploidFemale_4	Nextera Flex	B	STC1	Diploid Female	31.7	PRJNA947942
LineA_HaploidMale_5	Nextera Flex	A	C1	Haploid Male	30.3	PRJNA947942
LineA_HaploidMale_6	Nextera Flex	A	C18	Haploid Male	25.3	PRJNA947942
LineB_HaploidMale_4	Nextera Flex	B	STC1	Haploid Male	31	PRJNA947942
LineB_HaploidMale_5	Nextera Flex	B	STC12	Haploid Male	32.8	PRJNA947942
DiploidMale_1	Nextera Flex	A	C16	Diploid Male	57.9	PRJNA1075055
DiploidMale_2	Nextera Flex	A	C16	Diploid Male	32.7	PRJNA1075055
DiploidMale_3	Nextera Flex	A	C16	Diploid Male	31.5	PRJNA1075055
DiploidMale_4	Nextera Flex	A	C18	Diploid Male	38.3	PRJNA1075055
DiploidMale_5	Nextera Flex	A	C17	Diploid Male	47.7	PRJNA1075055
DiploidMale_6	Nextera Flex	A	C16	Diploid Male	28.4	PRJNA1075055
DiploidMale_7	Nextera Flex	A	C16	Diploid Male	32	PRJNA1075055
DiploidMale_8	Nextera Flex	A	C2	Diploid Male	30.2	PRJNA1075055
DiploidMale_9	Nextera Flex	A	C16	Diploid Male	41.6	PRJNA1075055
DiploidMale_10	Nextera Flex	A	C16	Diploid Male	28.1	PRJNA1075055
DiploidMale_11	Nextera Flex	A	C18	Diploid Male	40.2	PRJNA1075055
DiploidMale_12	Nextera Flex	A	C16	Diploid Male	38.5	PRJNA1075055
DiploidMale_13	Nextera Flex	A	C16	Diploid Male	35.4	PRJNA1075055
DiploidMale_14	Nextera Flex	A	C16	Diploid Male	34.4	PRJNA1075055
DiploidMale_15	Nextera Flex	A	C1	Diploid Male	31.5	PRJNA1075055
DiploidMale_16	Nextera Flex	A	C1	Diploid Male	32.2	PRJNA1075055
LineC_DiploidFemale	Nextera Flex	C	?	Diploid Female	39.4	PRJNA1075055
LineD_DiploidFemale_2	Nextera Flex	D	BG9	Diploid Female	35.2	PRJNA1075055
LineD_DiploidFemale_1	Nextera Flex	D	?	Diploid Female	36.9	PRJNA1075055
LineI_DiploidFemale	Nextera Flex	I	?	Diploid Female	36.1	PRJNA1075055
LineM_DiploidFemale	Nextera Flex	M	?	Diploid Female	32.3	PRJNA1075055
LineB_HaploidMale	Nextera Flex	B	?	Haploid Male	28.3	PRJNA1075055
LineC_HaploidMale	Nextera Flex	C	C9	Haploid Male	27.6	PRJNA1075055
LineD_HaploidMale_1	Nextera Flex	D	BG7	Haploid Male	25.2	PRJNA1075055
LineD_HaploidMale_2	Nextera Flex	D	BG9	Haploid Male	34.9	PRJNA1075055
LineI_HaploidMale	Nextera Flex	I	BG2	Haploid Male	21.2	PRJNA1075055
LineM_HaploidMale_1	Nextera Flex	M	BG14	Haploid Male	70.7	PRJNA1075055
LineM_HaploidMale_2	Nextera Flex	M	BG14	Haploid Male	34	PRJNA1075055
LineB_DiploidFemale	Nextera Flex	B	STC6	Diploid Female	42.8	PRJNA1075055
ShortReadPedigree1_Daughter	Nextera Flex	B	STC6 – dsRed	Diploid Female	39.1	PRJNA947942
ShortReadPedigree1_Mother	Nextera Flex	B	STC6 – dsRed	Diploid Female	41.4	PRJNA947942
ShortReadPedigree2_Daughter	Nextera Flex	B	STC6 – dsRed	Diploid Female	42	PRJNA947942
ShortReadPedigree2_Mother	Nextera Flex	B	STC6 – dsRed	Diploid Female	42.7	PRJNA947942
LinkedReadPedigree2_Sister_1	TELL-Seq	B	STC6 – dsRed	Diploid Female	74.7	PRJNA947942
LinkedReadPedigree2_Sister_2	TELL-Seq	B	STC6 – dsRed	Diploid Female	196.7	PRJNA947942
LinkedReadPedigree1_Mother	TELL-Seq	B	STC6 – dsRed	Diploid Female	221.5	PRJNA947942
LinkedReadPedigree1_Daughter	TELL-Seq	B	STC6 – dsRed	Diploid Female	90	PRJNA947942
LinkedReadPedigree3_Daughter_1	TELL-Seq	B	STC6 – dsRed	Diploid Female	73.6	PRJNA947942
LinkedReadPedigree3_Mother	TELL-Seq	B	STC6 – dsRed	Diploid Female	50.1	PRJNA947942
LinkedReadPedigree3_Daughter_2	TELL-Seq	B	STC6 – dsRed	Diploid Female	100.8	PRJNA947942
LinkedReadPedigree4_Mother	TELL-Seq	B	STC6 – dsRed	Diploid Female	92.4	PRJNA947942
LinkedReadPedigree4_Daughter_1	TELL-Seq	B	STC6 – dsRed	Diploid Female	91.1	PRJNA947942
LinkedReadPedigree4_Daughter_2	TELL-Seq	B	STC6 – dsRed	Diploid Female	81	PRJNA947942
LinkedReadPedigree5_Sister_1	TELL-Seq	B	STC6 – dsRed	Diploid Female	75.5	PRJNA947942
LinkedReadPedigree5_Sister_2	TELL-Seq	B	STC6 – dsRed	Diploid Female	70	PRJNA947942
LinkedReadPedigree6_Sister_1	TELL-Seq	B	STC6 – dsRed	Diploid Female	77.6	PRJNA947942
LinkedReadPedigree6_Sister_2	TELL-Seq	B	STC6 – dsRed	Diploid Female	69.3	PRJNA947942
LinkedReadPedigree7_Sister_1	TELL-Seq	B	STC6 - dsRed	Diploid Female	91.9	PRJNA947942
LinkedReadPedigree7_Sister_2	TELL-Seq	B	STC6 - dsRed	Diploid Female	82.3	PRJNA947942
