# Supplementary material for: Heterozygosity at a conserved candidate sex determination locus is associated with female development in the clonal raider ant (Ooceraea biroi)
Source: eLife. 2025 Nov 5;14:RP106913. doi: 10.7554/eLife.106913 (PMC12588609; doi:10.7554/eLife.106913)
Supplement: Supplementary file 5. [file elife-106913-supp5.xlsx]

## Sheet: Sheet1
L. fabarum CSD "region"	L. fabarum Gene ID	O. biroi homolog	O. biroi genomic locus
2	LF001188	XP_026823582.1	Chr2:8902488-8903163
2	LF001187	XP_011341081.1	Chr11:370661-370885
2	LF001186	XP_011337689.1	Chr9:12701112-12701246
2	LF001185	XP_011337690.1	Chr9:12701868-12702623
2	LF001185	XP_011337690.1	Chr9:12701868-12702623
2	LF001184	XP_019887284.1	Chr9:12784516-12784735
2	LF001183	XP_011337709.1	Chr9:12786107-12786502
2	LF001182	XP_011337688.2	Chr9:12691705-12691868
2	LF001182	XP_011337688.2	Chr9:12691705-12691868
2	LF001178	XP_011342643.1	Chr4:17418475-17418687
2	LF001175	XP_026825191.1	Chr4:17449644-17450001
2	LF001174	XP_011345175.1	Chr4:2098225-2098482
2	LF001173	XP_011351264.2	Chr4:17451378-17451779
2	LF001172	XP_011348371.2	Chr3:4120987-4121232
2	LF001171	XP_019886864.2	Chr4:13108487-13108728
2	LF001170	XP_011335781.1	Chr4:13104605-13104701
2	LF001169	XP_026824725.1	Chr4:13096987-13097135
2	LF001169	XP_026824725.1	Chr4:13096987-13097135
2	LF001168	XP_011334862.1	Chr1:5429156-5429315
2	LF001167	XP_011346080.1	Chr4:15317225-15317286
2	LF001166	XP_011346280.1	Chr4:15323952-15324443
2	LF001165	XP_011346265.1	Chr4:15325281-15325355
2	LF001164	XP_011333902.1	Chr9:13671279-13671529
2	LF001163	XP_011342394.2	Chr12:8945912-8946647
2	LF001162	XP_011347542.2	Chr5:13878906-13879057
2	LF001160	XP_011342397.1	Chr12:8898038-8898047
2	LF001159	XP_011342399.1	Chr12:8838643-8839361
2	LF001158	XP_026826742.1	Chr7:9069620-9070081
2	LF001157	XP_011336745.2	Chr7:9059981-9060079
2	LF001156	XP_011342557.1	Chr7:8937548-8938389
2	LF001155	XP_011333056.1	Chr2:8038775-8039241
2	LF001154	XP_011333053.1	Chr2:8074012-8074175
2	LF001153	XP_011333054.1	Chr2:8074146-8074195
2	LF001152	XP_011333051.1	Chr2:8149348-8149419
2	LF001151	XP_026827816.1	Chr8:9271044-9271606
2	LF001149	XP_026825880.1	Chr6:3921592-3922644
2	LF001148	XP_011338311.1	Chr7:9788316-9790754
2	LF001147	XP_011347933.1	Chr12:10190445-10190537
2	LF001146	XP_011335214.3	Chr11:13374668-13374686
2	LF001146	XP_011335214.3	Chr11:13374668-13374686
2	LF001146	XP_011335214.3	Chr11:13374668-13374686
2	LF001146	XP_011335214.3	Chr11:13374668-13374686
2	LF001146	XP_011335214.3	Chr11:13374668-13374686
2	LF001145	XP_026827302.1	Chr7:9709496-9709894
3	LF000382	XP_011346847.2	Chr1:10948255-10948488
3	LF000382	XP_011346847.2	Chr1:10948255-10948488
3	LF000383	XP_011346847.2	Chr1:10948255-10948488
3	LF000384	XP_011333915.1	Chr9:13583746-13584022
3	LF000386	XP_011338617.1	Chr2:15483180-15483410
3	LF000387	XP_011338616.2	Chr2:15484445-15484662
3	LF000390	XP_011338613.1	Chr2:15505270-15505403
3	LF000391	XP_026829310.1	Chr10:7183955-7184266
3	LF000392	XP_026826758.1	Chr7:5505525-5506433
3	LF000392	XP_026826758.1	Chr7:5505525-5506433
3	LF000393	XP_011341974.1	Chr7:5453558-5453828
3	LF000394	XP_019886900.1	Chr10:2038764-2039594
3	LF000395	XP_011349203.1	Chr4:4954193-4954244
3	LF000396	XP_011345154.1	Chr4:2157855-2158361
3	LF000397	XP_011352274.1	Chr7:203734-203802
3	LF000398	XP_026830084.1	Chr12:9934340-9935728
3	LF000399	XP_026830285.1	Chr13:8584249-8584824
3	LF000400	XP_011335143.1	Chr11:13391322-13391400
3	LF000401	XP_011336214.1	Chr11:11716747-11716790
3	LF000402	XP_011345301.1	Chr13:2249289-2249472
3	LF000403	XP_026830488.1	Chr13:2248176-2248407
3	LF000403	XP_026830488.1	Chr13:2248176-2248407
3	LF000403	XP_026830488.1	Chr13:2248176-2248407
3	LF000404	XP_011345919.1	Chr12:8096652-8097413
3	LF000405	XP_019889529.1	Chr13:9111829-9111940
3	LF000407	XP_011337549.1	Chr9:15451205-15451282
3	LF000408	XP_011351557.1	Chr5:4614020-4614156
3	LF000410	XP_011334973.2	Chr11:13498556-13498818
3	LF000411	XP_011337970.1	Chr7:12764736-12766373
3	LF002285	XP_011338781.1	Chr2:16117746-16118104
3	LF002286	XP_019887425.1	Chr2:16125070-16125404
3	LF002286	XP_019887425.1	Chr2:16125070-16125404
3	LF002287	XP_011338074.1	Chr7:12214725-12214961
3	LF002288	XP_011335962.1	Chr1:20844717-20844860
3	LF002289	XP_026823646.1	Chr2:16637198-16637380
3	LF002289	XP_026823646.1	Chr2:16637198-16637380
3	LF002289	XP_026823646.1	Chr2:16637198-16637380
3	LF002289	XP_026823646.1	Chr2:16637198-16637380
3	LF002290	XP_011336005.1	Chr1:20544946-20545045
3	LF002291	XP_026831057.1	Chr2:16812379-16813501
3	LF002292	XP_026831104.1	Chr2:16819356-16820705
3	LF002293	XP_026831104.1	Chr2:16819356-16820705
3	LF002296	XP_026828394.1	Chr9:14899993-14900040
3	LF002297	XP_019886768.2	Chr1:19222308-19222451
3	LF002297	XP_019886768.2	Chr1:19222308-19222451
3	LF002297	XP_019886768.2	Chr1:19222308-19222451
3	LF002298	XP_019889777.2	Chr7:5141809-5142057
3	LF002299	XP_019886808.1	Chr2:16884037-16884431
3	LF002300	XP_026825006.1	Chr4:2377212-2377305
3	LF002301	XP_011348694.1	Chr4:2367942-2368174
3	LF002302	XP_026825006.1	Chr4:2377212-2377305
3	LF002303	XP_011348699.1	Chr4:2386146-2386411
3	LF002304	XP_011350345.1	Chr4:8051873-8052036
3	LF002305	XP_011350347.1	Chr4:8052766-8052969
3	LF002306	XP_011337620.1	Chr9:15576650-15576680
3	LF002307	XP_011337625.1	Chr9:15576536-15576978
3	LF002308	XP_026824247.1	Chr3:10590193-10590478
3	LF002309	XP_019888231.1	Chr7:8924371-8925765
3	LF002310	XP_026824253.1	Chr3:10586163-10586300
3	LF002312	XP_026826755.1	Chr7:5509815-5510612
3	LF002313	XP_011329194.1	Chr11:847027-847118
3	LF002314	XP_011349559.2	Chr13:9386369-9386463
3	LF002315	XP_011333093.2	Chr3:9794768-9794937
3	LF002315	XP_011333093.2	Chr3:9794768-9794937
3	LF002318	XP_011333739.1	Chr3:15560244-15560328
3	LF002319	XP_011333739.1	Chr3:15560244-15560328
3	LF002321	XP_011344935.1	Chr10:9297465-9297664
3	LF002322	XP_011342759.1	Chr4:17388837-17389067
3	LF002323	XP_011333096.1	Chr3:9801594-9801632
3	LF002324	XP_026830338.1	Chr13:2378794-2378931
3	LF002325	XP_011333675.1	Chr11:9497118-9497256
3	LF002326	XP_011347567.1	Chr5:13957042-13957184
3	LF002327	XP_026830797.1	Chr14:7238938-7239145
3	LF002328	XP_011343665.1	Chr14:7321276-7321392
3	LF002328	XP_011343665.1	Chr14:7321276-7321392
3	LF002329	XP_011341939.1	Chr7:5246471-5246686
3	LF002330	XP_011347566.1	Chr5:13962033-13962259
3	LF002331	XP_026825510.1	Chr5:13964307-13964333
3	LF002332	XP_011344606.1	Chr1:22794512-22794678
3	LF002333	XP_011347655.1	Chr5:15247775-15247953
3	LF002334	XP_011341957.2	Chr7:5429102-5429536
3	LF002335	XP_011338783.2	Chr2:16112384-16112752
3	LF002336	XP_011335942.1	Chr1:21613665-21614096
3	LF002337	XP_026823940.1	Chr3:14533163-14533248
3	LF002338	XP_011333620.2	Chr3:14494369-14496705
3	LF002338	XP_011333620.2	Chr3:14494369-14496705
3	LF002340	XP_011333615.1	Chr3:14487295-14487394
3	LF002341	XP_011333610.1	Chr3:14469678-14470225
3	LF002342	XP_026831025.1	Chr1:1900527-1900742
3	LF002343	XP_011342722.1	Chr2:9443066-9443173
3	LF002344	XP_011336746.2	Chr7:9059981-9060079
3	LF002345	XP_026829935.1	Chr12:8103395-8103580
3	LF002345	XP_026829935.1	Chr12:8103395-8103580
3	LF002346	XP_011345921.1	Chr12:8107693-8108806
3	LF002347	XP_019888787.2	Chr12:8119273-8119816
3	LF002348	XP_011345923.2	Chr12:8124085-8124275
3	LF002348	XP_011345923.2	Chr12:8124085-8124275
3	LF002349	XP_026829855.1	Chr12:8157914-8158229
3	LF002349	XP_026829855.1	Chr12:8157914-8158229
3	LF002349	XP_026829855.1	Chr12:8157914-8158229
3	LF002350	XP_011345927.1	Chr12:8171391-8171651
3	LF002351	XP_011345928.2	Chr12:8172293-8172529
3	LF002353	XP_011347547.1	Chr5:13890987-13891126
3	LF002354	XP_026831106.1	Chr2:16898162-16900440
3	LF002355	XP_019890050.1	Chr10:1331247-1331374
3	LF002356	XP_011337159.1	Chr5:1700584-1700746
3	LF002357	XP_011352656.1	Chr11:2527061-2527567
3	LF002358	XP_011337758.2	Chr13:2376845-2376933
3	LF002359	XP_011342746.2	Chr4:17388313-17388616
3	LF002359	XP_011342746.2	Chr4:17388313-17388616
3	LF002360	XP_011343447.1	Chr4:17131792-17131946
3	LF002361	XP_011331147.2	Chr4:11068734-11068785
3	LF002362	XP_011345798.1	Chr4:15213481-15213677
3	LF002363	XP_011345817.1	Chr4:15215508-15215954
3	LF002364	XP_019889473.2	Chr4:15220312-15220911
3	LF002365	XP_011340809.1	Chr3:2701684-2702137
3	LF002366	XP_026824052.1	Chr3:2697959-2698230
3	LF002367	XP_026824725.1	Chr4:13096987-13097135
3	LF008641	XP_026824039.1	Chr3:9118311-9118866
4	LF005364	XP_011334504.1	Chr7:2098841-2099004
4	LF005365	XP_011342313.1	Chr12:9424093-9424190
4	LF005366	XP_011334041.1	Chr3:1349035-1349223
4	LF011889	XP_019886420.2	Chr3:10475465-10475573
5	LF003030	XP_026831077.1	Chr1:13554921-13555017
6	LF010888	XP_011344990.1	Chr10:8509474-8509767
6	LF009377	XP_011345605.2	Chr6:3471683-3472093
6	LF009377	XP_011345605.2	Chr6:3471683-3472093
6	LF009377	XP_011345605.2	Chr6:3471683-3472093
6	LF009379	XP_026828517.1	Chr9:8831304-8831370
6	LF009379	XP_026828517.1	Chr9:8831304-8831370
6	LF009379	XP_026828517.1	Chr9:8831304-8831370
6	LF009380	XP_011336797.1	Chr9:8837429-8837507
6	LF009381	XP_019887101.1	Chr9:8727410-8727519
6	LF009382	XP_026831406.1	Chr1:24511192-24511317
6	LF009382	XP_026831406.1	Chr1:24511192-24511317
6	LF009383	XP_026824186.1	Chr1:20167532-20167679
6	LF009384	XP_011342660.2	Chr7:8337474-8337620
6	LF009385	XP_011342660.2	Chr7:8337474-8337620
6	LF009386	XP_026828439.1	Chr9:8725506-8725902
6	LF009387	XP_026826104.1	Chr6:3608454-3608638
6	LF009389	XP_011345586.1	Chr6:3545693-3545764
6	LF009390	XP_011345587.1	Chr6:3542266-3542719
6	LF009391	XP_011336812.1	Chr9:9037569-9038229
6	LF009392	XP_026828409.1	Chr9:8861220-8865200
6	LF009393	XP_026829596.1	Chr11:13057235-13057309
6	LF009394	XP_011329564.1	Chr8:3674260-3674331
6	LF007431	XP_026828915.1	Chr1:10434755-10434933
6	LF007431	XP_026828915.1	Chr1:10434755-10434933
6	LF007432	XP_011331671.1	Chr9:14807644-14807839
6	LF007433	XP_011342213.1	Chr10:12611527-12611623
6	LF007434	XP_011342212.1	Chr10:12609888-12610342
6	LF007434	XP_011342212.1	Chr10:12609888-12610342
6	LF007436	XP_011337291.1	Chr2:9115215-9115236
6	LF007437	XP_026828146.1	Chr9:4587802-4588041
6	LF007438	XP_026829425.1	Chr11:6693825-6694146
6	LF007439	XP_011331274.1	Chr11:6694246-6694911
6	LF007440	XP_019886109.1	Chr11:6695786-6696124
6	LF007442	XP_011336194.1	Chr4:12380182-12380380
6	LF007443	XP_026830331.1	Chr13:9384275-9384535
6	LF007444	XP_011345852.1	Chr12:7367565-7367651
6	LF007445	XP_011335257.2	Chr3:7019336-7019555
6	LF007446	XP_026824186.1	Chr1:20167532-20167679
6	LF007446	XP_026824186.1	Chr1:20167532-20167679
6	LF007446	XP_026824186.1	Chr1:20167532-20167679
6	LF007446	XP_026824186.1	Chr1:20167532-20167679
6	LF007447	XP_026826373.1	Chr6:5911003-5911053
6	LF007448	XP_026824186.1	Chr1:20167532-20167679
6	LF007449	XP_011334216.1	Chr7:4769776-4770045
6	LF007450	XP_011349065.2	Chr12:27005-29771
6	LF007451	XP_011335419.1	Chr10:4847255-4847344
6	LF007452	XP_011335417.1	Chr10:4846815-4846859
6	LF007453	XP_026827807.1	Chr1:9089478-9089776
6	LF007455	XP_011335835.1	Chr10:2185332-2185676
6	LF007456	XP_011335834.1	Chr10:2178787-2178863
6	LF007457	XP_011329223.1	Chr11:762131-762397
6	LF007458	XP_011329224.1	Chr11:760857-760889
6	LF007459	XP_019886855.1	Chr4:13082208-13083182
6	LF007460	XP_026824731.1	Chr4:13078696-13078998
6	LF006413	XP_011335818.1	Chr10:2240022-2241763
6	LF006414	XP_011335862.1	Chr10:2135525-2135797
6	LF006415	XP_011335859.1	Chr10:2134826-2134936
6	LF006416	XP_011343295.1	Chr1:9058776-9058815
6	LF006417	XP_011343292.1	Chr1:9057219-9057283
6	LF006418	XP_011343292.1	Chr1:9057219-9057283
6	LF006419	XP_026829398.1	Chr11:2305329-2305581
6	LF006419	XP_026829398.1	Chr11:2305329-2305581
6	LF006420	XP_026829401.1	Chr11:2275861-2276530
6	LF006421	XP_011329296.1	Chr11:2271877-2272179
6	LF006422	XP_026829393.1	Chr11:7634951-7634983
6	LF006423	XP_026829706.1	Chr11:12285934-12286060
6	LF006424	XP_011344595.1	Chr1:22825831-22826081
6	LF006424	XP_011344595.1	Chr1:22825831-22826081
6	LF006425	XP_011352013.1	Chr8:6310826-6311037
6	LF006426	XP_011331632.1	Chr9:14579839-14579928
6	LF006427	XP_011352461.1	Chr7:15410331-15410681
6	LF006429	XP_011343549.1	Chr2:751822-752041
6	LF006430	XP_011349203.1	Chr4:4954193-4954244
6	LF006431	XP_011343549.1	Chr2:751822-752041
6	LF006432	XP_026827963.1	Chr9:14575261-14575420
6	LF006433	XP_011352574.1	Chr11:3070833-3070971
6	LF006433	XP_011352574.1	Chr11:3070833-3070971
6	LF006434	XP_011337828.2	Chr9:5812211-5812382
6	LF006435	XP_011349204.1	Chr4:4957779-4958419
6	LF006436	XP_011337810.1	Chr9:5882093-5882191
6	LF006437	XP_026823896.1	Chr3:805152-805214
6	LF006438	XP_011340786.1	Chr3:2598144-2598261
6	LF006439	XP_026823896.1	Chr3:805152-805214
6	LF006440	XP_011337822.1	Chr9:5860948-5861173
6	LF006440	XP_011337822.1	Chr9:5860948-5861173
6	LF006441	XP_019887296.1	Chr9:5860223-5860442
6	LF006442	XP_011331327.2	Chr11:5860356-5861681
6	LF006443	XP_026829555.1	Chr11:5855375-5855507
6	LF006444	XP_026824731.1	Chr4:13078696-13078998
6	LF004259	XP_011345653.1	Chr6:3026242-3028545
6	LF004259	XP_011345653.1	Chr6:3026242-3028545
6	LF004260	XP_011345657.1	Chr6:3023351-3023556
6	LF004261	XP_011333413.1	Chr3:11511683-11511793
6	LF004262	XP_011351420.1	Chr5:6432092-6432208
6	LF004264	XP_026826171.1	Chr6:5325828-5326190
6	LF004265	XP_011346014.1	Chr6:5325587-5325696
6	LF004266	XP_026826168.1	Chr6:5323418-5323504
6	LF004267	XP_011345652.1	Chr6:3045096-3045236
6	LF004269	XP_011345654.1	Chr6:3040496-3040563
6	LF004270	XP_011339354.1	Chr1:3930870-3931115
6	LF004271	XP_026826524.1	Chr6:3008743-3016188
6	LF004271	XP_026826524.1	Chr6:3008743-3016188
6	LF004271	XP_026826524.1	Chr6:3008743-3016188
6	LF004271	XP_026826524.1	Chr6:3008743-3016188
6	LF004272	XP_026828184.1	Chr9:13111407-13111541
6	LF004273	XP_026828185.1	Chr9:13086623-13086800
6	LF004274	XP_011333961.2	Chr9:13105804-13106034
6	LF004275	XP_011348142.2	Chr4:1434786-1435024
6	LF004276	XP_011340055.1	Chr13:7326557-7326826
6	LF004277	XP_026830287.1	Chr13:5035511-5035847
6	LF004279	XP_019887713.2	Chr13:4920080-4920324
6	LF004280	XP_011340067.2	Chr13:4897303-4901754
6	LF004280	XP_011340067.2	Chr13:4897303-4901754
6	LF004280	XP_011340067.2	Chr13:4897303-4901754
6	LF004281	XP_011340070.1	Chr13:4895933-4896176
6	LF004282	XP_011336869.1	Chr9:7349357-7349991
6	LF004283	XP_011339358.1	Chr1:3933442-3933591
6	LF004285	XP_011339356.1	Chr1:3937027-3937044
6	LF004286	XP_011339359.1	Chr1:3941264-3941427
6	LF004287	XP_011339359.1	Chr1:3941264-3941427
6	LF004288	XP_011344952.1	Chr10:9007970-9008172
6	LF004289	XP_011344954.1	Chr10:9003166-9003200
6	LF004290	XP_011344958.1	Chr10:8994570-8994686
6	LF004291	XP_011329385.1	Chr10:1633362-1633470
6	LF004292	XP_011329393.1	Chr10:1634963-1635204
6	LF004293	XP_011329393.1	Chr10:1634963-1635204
6	LF004294	XP_011329389.1	Chr10:1645838-1646248
6	LF004295	XP_026829098.1	Chr10:1647341-1647849
6	LF004296	XP_011329398.1	Chr10:1650088-1651341
6	LF004296	XP_011329398.1	Chr10:1650088-1651341
6	LF004297	XP_011337200.1	Chr7:7915393-7915548
6	LF004298	XP_026827348.1	Chr7:7916367-7916552
6	LF004299	XP_026827076.1	Chr1:7279248-7279325
6	LF004300	XP_011345863.1	Chr12:7388227-7388336
6	LF004301	XP_011345866.1	Chr12:7391418-7391629
6	LF004302	XP_011345466.1	Chr2:14533815-14534021
6	LF004303	XP_011343443.1	Chr7:10202220-10202623
6	LF004305	XP_011329969.1	Chr8:13384806-13384905
6	LF004305	XP_011329969.1	Chr8:13384806-13384905
6	LF004306	XP_026825681.1	Chr5:10051561-10051588
6	LF004307	XP_011346998.2	Chr8:14292863-14293716
6	LF004308	XP_011337232.1	Chr7:7682544-7682629
6	LF004309	XP_011331820.1	Chr9:450924-451223
6	LF004310	XP_011330274.1	Chr4:10793001-10793258
6	LF004311	XP_011345060.1	Chr10:7937737-7937849
6	LF004312	XP_026827788.1	Chr1:9083319-9083473
6	LF004312	XP_026827788.1	Chr1:9083319-9083473
6	LF004313	XP_011343304.1	Chr1:9082377-9082587
6	LF004314	XP_011330198.1	Chr4:10755815-10755993
6	LF004315	XP_011334459.1	Chr7:2283750-2284486
6	LF004316	XP_011339244.1	Chr1:3588029-3588192
6	LF004317	XP_026828329.1	Chr9:14054627-14054801
6	LF004317	XP_026828329.1	Chr9:14054627-14054801
6	LF004318	XP_011331508.2	Chr9:14061763-14061837
6	LF004319	XP_011331505.1	Chr9:14062698-14062811
6	LF004320	XP_011334857.1	Chr1:5454703-5454882
6	LF005974	XP_026828018.1	Chr1:5439229-5439530
6	LF005975	XP_011334860.2	Chr1:5434057-5434711
6	LF005976	XP_026827305.1	Chr7:8473920-8474183
6	LF005977	XP_011330739.1	Chr8:10462228-10462411
6	LF005978	XP_011330737.1	Chr8:10468312-10468396
6	LF005979	XP_011349122.1	Chr12:277094-277179
6	LF005980	XP_026824516.1	Chr3:12947714-12949000
6	LF005981	XP_011332350.1	Chr6:1628389-1628441
6	LF005982	XP_011351118.1	Chr14:2865850-2866011
6	LF005983	XP_011345061.1	Chr10:7928695-7928868
6	LF005984	XP_011345062.1	Chr10:7924312-7924663
6	LF005985	XP_011338878.1	Chr1:1486009-1486266
6	LF005986	XP_011345091.1	Chr10:7358649-7358818
6	LF005987	XP_011345085.1	Chr10:7382381-7382723
6	LF005989	XP_011345087.1	Chr10:7383338-7383519
6	LF005991	XP_019888652.1	Chr10:7645163-7645175
6	LF005992	XP_011345080.1	Chr10:7647698-7647862
6	LF005993	XP_011345081.1	Chr10:7649238-7649498
6	LF005994	XP_011335587.1	Chr10:3611073-3611430
6	LF005995	XP_011335585.1	Chr10:3617454-3617666
6	LF005996	XP_011335586.1	Chr10:3618392-3618466
6	LF005998	XP_011335579.1	Chr10:3670372-3670597
6	LF005999	XP_011335574.1	Chr10:3798053-3798466
6	LF006000	XP_011335569.1	Chr10:3800730-3800831
6	LF006002	XP_019888003.1	Chr6:2510924-2511178
6	LF006003	XP_011341632.2	Chr6:2491411-2491420
6	LF006004	XP_011341633.1	Chr6:2485102-2485164
6	LF006005	XP_026826688.1	Chr6:2483634-2483969
6	LF006006	XP_011334809.1	Chr1:5682988-5683224
6	LF006007	XP_011333725.1	Chr3:15156949-15157037
6	LF006008	XP_026827630.1	Chr1:5696215-5696343
6	LF006009	XP_011334805.1	Chr1:5696804-5696984
6	LF006011	XP_026827900.1	Chr8:3473774-3473863
6	LF006012	XP_011346986.1	Chr8:14327158-14327217
6	LF006013	XP_011346817.1	Chr1:11047741-11047827
6	LF006014	XP_011346814.2	Chr1:11042895-11042925
6	LF006015	XP_011343298.1	Chr1:9066719-9067238
6	LF006016	XP_011343299.1	Chr1:9074220-9074383
6	LF006018	XP_011330337.1	Chr11:12610357-12610821
6	LF006018	XP_011330337.1	Chr11:12610357-12610821
6	LF006019	XP_011330537.1	Chr4:10831178-10831370
6	LF006020	XP_011330547.1	Chr4:10830112-10830472
6	LF006599	XP_026824000.1	Chr3:15073019-15073218
6	LF006601	XP_011333707.2	Chr3:15069612-15069744
6	LF006602	XP_026824000.1	Chr3:15073019-15073218
6	LF006602	XP_026824000.1	Chr3:15073019-15073218
6	LF006602	XP_026824000.1	Chr3:15073019-15073218
6	LF006602	XP_026824000.1	Chr3:15073019-15073218
6	LF006602	XP_026824000.1	Chr3:15073019-15073218
6	LF006603	XP_011333707.2	Chr3:15069612-15069744
6	LF006603	XP_011333707.2	Chr3:15069612-15069744
6	LF006604	XP_011333707.2	Chr3:15069612-15069744
6	LF006604	XP_011333707.2	Chr3:15069612-15069744
6	LF006605	XP_026824000.1	Chr3:15073019-15073218
6	LF006606	XP_011331848.1	Chr9:587811-587881
6	LF006607	XP_011333716.1	Chr3:15073981-15074049
6	LF006608	XP_011329905.2	Chr8:14088136-14088231
6	LF006609	XP_011329905.2	Chr8:14088136-14088231
6	LF006611	XP_011334791.1	Chr1:5731015-5731140
6	LF006613	XP_011334796.1	Chr1:5726449-5726931
6	LF006614	XP_011332839.1	Chr6:14149691-14150234
6	LF006615	XP_011332839.1	Chr6:14149691-14150234
6	LF006616	XP_011332821.2	Chr6:14152496-14152628
6	LF006616	XP_011332821.2	Chr6:14152496-14152628
6	LF006616	XP_011332821.2	Chr6:14152496-14152628
6	LF006617	XP_011332825.1	Chr6:14184424-14184557
6	LF006618	XP_011332827.2	Chr6:14191487-14191902
6	LF006619	XP_011332863.2	Chr6:14063075-14064223
6	LF006620	XP_011332866.3	Chr6:14083471-14083668
6	LF006621	XP_011332857.1	Chr6:14084068-14084244
