# Supplementary material for: Heterozygosity at a conserved candidate sex determination locus is associated with female development in the clonal raider ant (Ooceraea biroi)
Source: eLife. 2025 Nov 5;14:RP106913. doi: 10.7554/eLife.106913 (PMC12588609; doi:10.7554/eLife.106913)
Supplement: Supplementary file 6. [file elife-106913-supp6.xlsx]

## Sheet: Sheet1
V. emeryi CSD QTL	V. emeryi GeneID	OrthoFinder O. biroi "Ortholog"	O. biroi genomic locus
2	LOC105559778	LOC105285603	Chr4:1637384-1672949
2	LOC105559779	LOC105285604	Chr4:1673043-1674418
2	LOC105559781	LOC105285607	Chr4:1674523-1676002
2	LOC105559780	LOC105285605	Chr4:1675932-1678296
2	LOC105559782	LOC105283856, LOC113561733	Chr4:1727256-1729679; Chr4:22762-24749
2	LOC105559784	LOC105283852	Chr4:1729888-1737844
2	LOC105559783	LOC105283851	Chr4:1730326-1732211
2	LOC105559785	LOC105283850	Chr4:1738076-1749057
2	LOC105559786	LOC105282554	Chr4:7069030-7075460
2	LOC105559787	LOC105282557	Chr4:7075106-7080018
2	LOC105559788	LOC105286165	Chr4:4951574-4955391
2	LOC105559790	LOC105282568	Chr4:7141680-7152824
2	LOC105559789	LOC105282568	Chr4:7141680-7152824
2	LOC105559791	LOC105283915	Chr4:5377245-5381427
2	LOC105559793	LOC105283797	Chr4:2173362-2237652
1	LOC105558826	LOC105287916	Chr2:985469-993787
1	LOC105558815	LOC105283998	Chr2:14515051-14517463
1	LOC105558816	LOC105283997, LOC113563596	Chr2:14517342-14519998; Chr2:19219509-19221771
1	LOC105558817	LOC105283996, LOC113563597	Chr2:14519947-14522109; Chr2:19217723-19219230
1	LOC105558818	LOC105283999	Chr2:14522233-14522882
1	LOC105558819	LOC105278142	Chr2:16951611-16953740
1	LOC105558820	LOC105278143	Chr2:16947572-16951531
1	LOC105558821	LOC105278141	Chr2:16939029-16945082
1	LOC105558822	LOC105287131	Chr2:12765464-12768244
1	LOC105558823	LOC105278140	Chr2:16929798-16936497
