# Supplementary material for: Heterozygosity at a conserved candidate sex determination locus is associated with female development in the clonal raider ant (Ooceraea biroi)
Source: eLife. 2025 Nov 5;14:RP106913. doi: 10.7554/eLife.106913 (PMC12588609; doi:10.7554/eLife.106913)
Supplement: Supplementary file 8. [file elife-106913-supp8.xlsx]

## Sheet: Sheet1
	Gene_type	RU	RefSeq	GenBank
Genes	guide_RNA	0	1	0
	lncRNA	1767	1430	0
	miRNA	239	0	0
	misc_RNA	0	44	0
	piRNA	23596	0	0
	protein_coding	12839	11927	13022
	pseudogene	0	373	77
	rRNA	108	109	0
	snoRNA	15	16	0
	snRNA	22	26	0
	tRNA	194	202	0
Total Genes		38780	14128	13099
Transcripts	lncRNA	3795	1751	0
	miRNA	239	0	0
	mRNA	63620	24215	13099
	piRNA	23596	0	0
	rRNA	108	109	0
	snoRNA	15	16	0
	snRNA	22	26	0
	tRNA	194	202	0
	guide_RNA	0	1	0
	transcript	0	818	0
Total transcripts		91589	27135	13099
Total multi-exon transcripts		65882	25945	11923
