# Supplementary material for: Heterozygosity at a conserved candidate sex determination locus is associated with female development in the clonal raider ant (Ooceraea biroi)
Source: eLife. 2025 Nov 5;14:RP106913. doi: 10.7554/eLife.106913 (PMC12588609; doi:10.7554/eLife.106913)
Supplement: Supplementary file 10. — The log 2-fold change in expression levels between male and female samples, p-values (Wald test), and adjusted p-values (Benjamini–Hochberg adjustment) for 17 genes in the vicinity of the CSD index peak. The p-values are ‘NA’ for LOC105283850 because one of the samples is an extreme outlier detected by Cook’s distance. [file elife-106913-supp10.xlsx]

## Sheet: Sheet1
Gene Name	Gene ID	Log 2-Fold Change	p-value	p-adjusted
unchar. protein	LOC105285599	0.11	0.84	0.92
unchar. protein	LOC105285600	0.11	0.73	0.85
paraneoplastic antigen Ma6E	LOC105285601	0.21	0.67	0.82
ataxin-7	LOC105285602	-0.33	0.063	0.17
Kank	LOC105285603	0.05	0.82	0.91
Bet1	LOC105285604	0.08	0.54	0.72
prob. ribosome prod. factor	LOC105285607	0.34	0.12	0.27
THUMP	LOC105285605	0.19	0.13	0.28
unchar. lncRNA	LOC105285608	0.12	0.87	0.93
Creld	LOC113561733	0.56	0.77	0.88
alphaCOP	LOC105283852	-0.17	0.21	0.4
unchar. protein	LOC105283851	9.95	NA	NA
Host cell factor	LOC105283850	-0.52	0.00021	0.0018
l(2)37Cg	LOC105283849	0.86	0.00057	0.0042
ribosomal protein S2	LOC105283847	-0.06	0.5	0.69
guanine deaminase	LOC105283846	0.03	0.88	0.94
unchar. protein	LOC105283844	1.77	6.1e-08	1e-07
