# Supplementary material for: Heterozygosity at a conserved candidate sex determination locus is associated with female development in the clonal raider ant (Ooceraea biroi)
Source: eLife. 2025 Nov 5;14:RP106913. doi: 10.7554/eLife.106913 (PMC12588609; doi:10.7554/eLife.106913)
Supplement: Supplementary file 11. — The log 2-fold change in expression levels between male and female samples, p-values (likelihood ratio test), and adjusted p-values (Benjamini–Hochberg adjustment) for each exon of 17 genes in the vicinity of the CSD index peak. The p-values are ‘NA’ for one of the exons of LOC105285603 because there is negligible expression of that exon (basemean = 0). [file elife-106913-supp11.xlsx]

## Sheet: Sheet1
Gene Name	Gene ID	Exon	Log 2-Fold Change	p-value	p-adjusted
unchar. protein	LOC105285599	E001	-0.24	0.37	0.84
		E002	0.09	0.6	0.91
		E003	0.21	0.63	0.92
unchar. protein	LOC105285600	E001	-0.59	0.32	0.82
		E002	-0.23	0.78	0.96
		E003	0.51	0.15	0.72
		E004	0.03	0.87	0.98
		E005	0.06	0.73	0.95
		E006	-0.54	0.31	0.82
		E007	-0.48	0.35	0.83
		E008	0.11	0.91	0.99
		E009	-0.66	0.65	0.92
		E010	0.08	0.92	0.99
		E011	0.11	0.91	0.99
paraneoplastic antigen Ma6E	LOC105285601	E001	-0.28	0.06	0.51
		E002	0.18	0.06	0.5
ataxin-7	LOC105285602	E001	2.03	0.1	0.63
		E002	0.12	0.98	1
		E003	0.06	0.75	0.95
		E004	0.05	0.69	0.94
		E005	-0.04	0.48	0.87
		E006	-0.48	0.01	0.17
		E007	0.12	0.55	0.89
Kank	LOC105285603	E001	-0.93	0.24	0.79
		E002	-0.65	0.05	0.47
		E003	-0.14	0.72	0.94
		E004	-1.04	0.44	0.86
		E005	-1.6	0.29	0.81
		E006	-0.55	0.08	0.57
		E007	-0.67	0.04	0.4
		E008	-0.63	0.08	0.58
		E009	0.01	0.88	0.98
		E010	-0.15	0.34	0.83
		E011	-0.28	0.2	0.76
		E012	-0.27	0.2	0.76
		E013	-0.27	0.18	0.74
		E014	0.07	0.3	0.81
		E015	0.11	0.07	0.54
		E016	0.18	0.26	0.8
		E017	NA	NA	NA
Bet1	LOC105285604	E001	2.7	0.05	0.47
		E002	0	0.99	1
		E003	-0.04	0.67	0.93
		E004	-0.01	0.82	0.97
		E005	0.05	0.94	1
		E006	9.44	0.23	0.78
prob. ribosome prod. factor	LOC105285607	E001	0.24	0.77	0.96
		E002	-0.12	0.77	0.96
		E003	0.05	0.7	0.94
		E004	0	1	1
		E005	0.3	0.55	0.89
THUMP	LOC105285605	E001	1.26	0.04	0.42
		E002	-0.12	0.49	0.87
		E003	-0.09	0.55	0.89
		E004	0.03	0.79	0.96
		E005	0.13	0.19	0.75
		E006	-0.03	0.96	1
		E007	-0.09	0.76	0.95
		E008	-0.09	0.68	0.93
		E009	3.9	0.000257	0.00951
unchar. lncRNA	LOC105285608	E001	-1.46	0.08	0.56
		E002	0.28	0.06	0.5
Creld	LOC113561733	E001	-0.06	0.62	0.92
		E002	-0.01	0.86	0.98
		E003	0.09	0.32	0.82
		E004	-0.15	0.6	0.91
alphaCOP	LOC105283852	E001	-0.29	0.3	0.81
		E002	-0.23	0.33	0.83
		E003	-0.21	0.25	0.79
		E004	-0.15	0.16	0.73
		E005	0.14	0.19	0.75
		E006	0.32	0.3	0.81
		E007	0.74	0.14	0.69
unchar. protein	LOC105283851	E001	-0.07	0.76	0.96
		E002	0.14	0.76	0.96
Host cell factor	LOC105283850	E001	-0.34	0.28	0.8
		E002	-0.33	0.24	0.79
		E003	-0.25	0.38	0.84
		E004	-0.34	0.36	0.84
		E005	-0.19	0.5	0.88
		E006	-0.19	0.39	0.85
		E007	0.75	0.12	0.67
		E008	-0.23	0.33	0.82
		E009	0.3	0.39	0.85
		E010	-0.05	0.93	1
		E011	0.44	0.34	0.83
		E012	0	0.59	0.91
		E013	0	0.35	0.83
		E014	0.45	0.12	0.67
		E015	0.04	0.2	0.77
		E016	-0.35	0.56	0.9
		E017	0.14	0.07	0.55
		E018	0.11	0.48	0.87
		E019	0.35	0.38	0.84
l(2)37Cg	LOC105283849	E001	0.04	0.54	0.89
		E002	-0.03	0.6	0.91
		E003	0	0.94	1
ribosomal protein S2	LOC105283847	E001	0.1	0.54	0.89
		E002	-0.03	0.45	0.86
		E003	-0.06	0.63	0.92
		E004	3.68	0.00233	0.06
guanine deaminase	LOC105283846	E001	0.29	0.31	0.82
		E002	0.15	0.52	0.89
		E003	0.15	0.37	0.84
		E004	0.12	0.55	0.89
		E005	0.1	0.58	0.9
		E006	-0.06	0.62	0.92
		E007	-0.09	0.41	0.85
		E008	-0.17	0.18	0.75
		E009	-0.26	0.07	0.54
unchar. protein	LOC105283844	E001	-0.52	0.000763	0.02
		E002	-0.54	5.19e-06	0.000311
		E003	-0.56	0.000378	0.01
		E004	-0.91	0.00693	0.13
		E005	-0.85	0.00588	0.11
		E006	-0.92	0.000107	0.00449
		E007	-0.91	0.00434	0.09
		E008	-0.8	0.00161	0.04
		E009	-0.53	0.00458	0.1
		E010	-0.54	2.88e-05	0.00143
		E011	-0.46	0.000237	0.00887
		E012	0.57	7.31e-07	5.43e-05
		E013	0.79	4.43e-06	0.00027
		E014	1.11	1.32e-07	1.15e-05
		E015	1.07	3.96e-07	3.1e-05
		E016	0.86	0.000705	0.0219
		E017	0.8	0.000814	0.0245
		E018	1.29	0.000153	0.00613
		E019	1.29	0.000454	0.0152
		E020	1.13	0.000177	0.00694
		E021	0.99	0.00261	0.06
		E022	-0.89	0.55	0.89
		E023	1.32	0.000135	0.00547
		E024	1.11	0.07	0.55
		E025	-0.57	0.44	0.86
		E026	-0.24	0.32	0.82
		E027	0.09	0.00973	0.165
		E028	0.21	0.0003	0.0107
		E029	-0.59	2.27e-08	2.29e-06
		E030	-0.23	8.42e-06	0.000479
		E031	0.51	0.00158	0.0418
