# Supplementary material for: Heterozygosity at a conserved candidate sex determination locus is associated with female development in the clonal raider ant (Ooceraea biroi)
Source: eLife. 2025 Nov 5;14:RP106913. doi: 10.7554/eLife.106913 (PMC12588609; doi:10.7554/eLife.106913)
Supplement: Supplementary file 12. [file elife-106913-supp12.xlsx]

## Sheet: Sheet1
Analysis	Program	Version	Analysis Available At:
Genetic Mapping	Trimmomatic	v0.36	https://github.com/kipdlacy/SexDetermination_Obiroi
Genetic Mapping	bwa	v0.7.12-r1039	https://github.com/kipdlacy/SexDetermination_Obiroi
Genetic Mapping	GATK	v4.2	https://github.com/kipdlacy/SexDetermination_Obiroi
Genetic Mapping	vcftools	v0.1.17	https://github.com/kipdlacy/SexDetermination_Obiroi
Genetic Mapping	pyvcf	v0.6.8	https://github.com/kipdlacy/SexDetermination_Obiroi
Genetic Mapping	pybedtools	v0.9.0	https://github.com/kipdlacy/SexDetermination_Obiroi
Genetic Mapping	pandas	v1.1.5	https://github.com/kipdlacy/SexDetermination_Obiroi
Genetic Mapping	numpy	v.1.19.5	https://github.com/kipdlacy/SexDetermination_Obiroi
Genetic Mapping	bcftools	v0.1.19-96b5f2294a	https://github.com/kipdlacy/SexDetermination_Obiroi
Genetic Mapping	samtools	v1.8	https://github.com/kipdlacy/SexDetermination_Obiroi
Genetic Mapping	OrthoFinder	v2.5.5	https://github.com/kipdlacy/SexDetermination_Obiroi
Genetic Mapping	scikit-allel	v1.3.5	https://github.com/kipdlacy/SexDetermination_Obiroi
Genetic Mapping	blast	v2.5.0	https://github.com/kipdlacy/SexDetermination_Obiroi
Genetic Mapping	mummer	v4.0.0rc1	https://github.com/kipdlacy/SexDetermination_Obiroi
Genetic Mapping	python	v3.6.15	https://github.com/kipdlacy/SexDetermination_Obiroi
Genetic Mapping	R	v4.3.2	https://github.com/kipdlacy/SexDetermination_Obiroi
Genetic Mapping	karyoploteR	1.28.0	https://github.com/kipdlacy/SexDetermination_Obiroi
Genetic Mapping	ggplot2	v3.5.0	https://github.com/kipdlacy/SexDetermination_Obiroi
Genetic Mapping	ggbeeswarm	v0.7.2	https://github.com/kipdlacy/SexDetermination_Obiroi
Genetic Mapping	matplotlib	v3.3.4	https://github.com/kipdlacy/SexDetermination_Obiroi
Genome Annotation	pbmm2	v1.12.0	https://github.com/RockefellerUniversity/Obiroi_GeneModels_2025
Genome Annotation	stringtie2	v2.2.1	https://github.com/RockefellerUniversity/Obiroi_GeneModels_2025
Genome Annotation	samtools	v1.6	https://github.com/RockefellerUniversity/Obiroi_GeneModels_2025
Genome Annotation	hisat2	v2.2.1	https://github.com/RockefellerUniversity/Obiroi_GeneModels_2025
Genome Annotation	transdecoder	v5.7.1	https://github.com/RockefellerUniversity/Obiroi_GeneModels_2025
Genome Annotation	squanti3	v3.5.1	https://github.com/RockefellerUniversity/Obiroi_GeneModels_2025
Genome Annotation	Repeatmasker	v4.1.7-p1	https://github.com/RockefellerUniversity/Obiroi_GeneModels_2025
Genome Annotation	FEELnc	v0.2.1	https://github.com/RockefellerUniversity/Obiroi_GeneModels_2025
Genome Annotation	BUSCO	v5.4.7	https://github.com/RockefellerUniversity/Obiroi_GeneModels_2025
Genome Annotation	CLIPflexR	v0.1.20	https://github.com/RockefellerUniversity/Obiroi_GeneModels_2025
Genome Annotation	miRDeep2	v0.1.3	https://github.com/RockefellerUniversity/Obiroi_GeneModels_2025
Genome Annotation	Pilfer	v1.0	https://github.com/RockefellerUniversity/Obiroi_GeneModels_2025
Genome Annotation	R	v4.0	https://github.com/RockefellerUniversity/Obiroi_GeneModels_2025
Genome Annotation	Bioconductor	v3.19	https://github.com/RockefellerUniversity/Obiroi_GeneModels_2025
Differential Gene Expression	multiqc	v1.9	https://github.com/jina-leemon/CSD_biroi_male-female-RNA-seq
Differential Gene Expression	RSEM	v1.2.28	https://github.com/jina-leemon/CSD_biroi_male-female-RNA-seq
Differential Gene Expression	STAR	v2.5.0a	https://github.com/jina-leemon/CSD_biroi_male-female-RNA-seq
Differential Gene Expression	R	v4.3.3	https://github.com/jina-leemon/CSD_biroi_male-female-RNA-seq
Differential Gene Expression	GenomicFeatures	v1.52.2	https://github.com/jina-leemon/CSD_biroi_male-female-RNA-seq
Differential Gene Expression	tximport	v1.28.0	https://github.com/jina-leemon/CSD_biroi_male-female-RNA-seq
Differential Gene Expression	DESeq2	v1.40.2	https://github.com/jina-leemon/CSD_biroi_male-female-RNA-seq
Differential Gene Expression	EnhancedVolcano	v1.18.0	https://github.com/jina-leemon/CSD_biroi_male-female-RNA-seq
Differential Gene Expression	pheatmap	v1.0.12	https://github.com/jina-leemon/CSD_biroi_male-female-RNA-seq
Differential Gene Expression	dplyr	v1.1.4	https://github.com/jina-leemon/CSD_biroi_male-female-RNA-seq
Differential Gene Expression	reshape2	v1.4.4	https://github.com/jina-leemon/CSD_biroi_male-female-RNA-seq
Differential Gene Expression	tidyr	v1.3.1	https://github.com/jina-leemon/CSD_biroi_male-female-RNA-seq
Differential Gene Expression	tibble	v3.2.1	https://github.com/jina-leemon/CSD_biroi_male-female-RNA-seq
Differential Gene Expression	ggbreak	v.0.1.2	https://github.com/jina-leemon/CSD_biroi_male-female-RNA-seq
Differential Exon Usage	HTSeq	v2.0.5	https://github.com/jina-leemon/CSD_biroi_male-female-RNA-seq
Differential Exon Usage	DEXSeq	v.1.46.0	https://github.com/jina-leemon/CSD_biroi_male-female-RNA-seq
Differential Exon Usage	stageR	v.1.22.0	https://github.com/jina-leemon/CSD_biroi_male-female-RNA-seq
